# Supplementary figures and images for: Feasibility Study on the Use of the Seeding Growth Technique in Producing a Highly Stable Gold Nanoparticle Colloidal System
Source: Hindawi journal article supplement (doi:10.1155/2015/537125), 2015-01-01

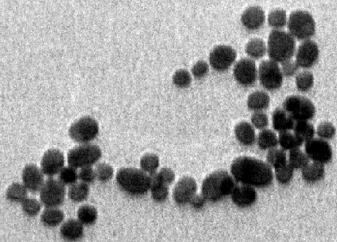

10 nm

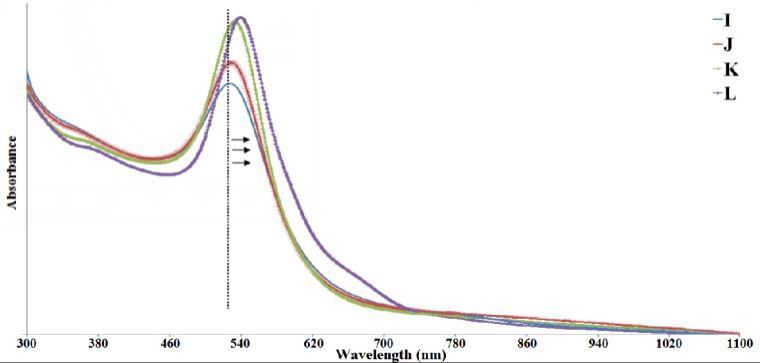

Supplement: f1 [file 537125.f1.pdf]
